# Supplementary material
Source: publisher figshare collection journal article supplement (https://gsajournals.figshare.com/ndownloader/files/24527444)
Supplement: Supplementary file 1 [file 24527444]

## Sheet: Sheet2
TABLE S5. FITNESS SCORES FOR SEVEN PUTATIVE AFB1 RESISTANT GENES RANKED BY SIGNIFICANCE WHICH WERE NOT CONFIRMED
Gene1.	m. value2.	Gene Function3.	q.value4.
MYO4	-1.71	Type V myosin motor involved in actin-based transport of cargos	0.0265
VPS13	-7.39	Protein involved in prospore membrane morphogenesis; peripheral membrane protein that localizes to the prospore membrane and at numerous membrane contact sites	0.000118
TCM62	-4	Protein involved in assembly of the succinate dehydrogenase complex; mitochondrial; putative chaperon	0.000432
SKG3	-2.8	Protein of unknown function; potential Cdc28p substrate; similar to Skg4p; relocalizes from bud neck to cytoplasm upon DNA replication stress	0.000864
TES1	-1.95	Peroxisomal acyl-CoA thioesterase	0.0158
MYO4	-1.71	Type V myosin motor involved in actin-based transport of cargos	0.0265
ELP6	-1.02	Subunit of hexameric RecA-like ATPase Elp456 Elongator subcomplex; which is required for modification of wobble nucleosides in tRNA;	0.0953
1. Genes in “bold” are those that are responsive to replication stress.
2..m.value is the numeric vector of fold change on a log2 scale, rounded to three significant digits.
3.Gene function descriptions obtained from www.yeastgenome.org.
4.q value is the numeric vector calculated based on the p-value using the p.adjust function with default parameter settings, rounded to three significant digits.
